# Supplementary material
Source: Research Square preprint supplement (doi:10.21203/rs.3.rs-8816883/v1)
Supplement: Supplementary file 1 [file 6e63d458d418263edd3db592.pdf]

## CONSORT 2010 Checklist

| Section/Topic                    | Item No | Checklist Item                                                                                                                                                                              | Reported on Page No                            |
|----------------------------------|---------|---------------------------------------------------------------------------------------------------------------------------------------------------------------------------------------------|------------------------------------------------|
| Title and abstract               | 1a      | Identification as a randomised trial in the title                                                                                                                                           | Page 1                                         |
|                                  | 1b      | Structured summary of trial design, methods, results, and conclusions (for specific guidance see CONSORT for abstracts)                                                                     | Page 1-2 (Abstract)                            |
| <b>Introduction</b>              |         |                                                                                                                                                                                             |                                                |
| Background and objectives        | 2a      | Scientific background and explanation of rationale                                                                                                                                          | Page 2-5 (Introduction)                        |
|                                  | 2b      | Specific objectives or hypotheses                                                                                                                                                           | Page 5 (last paragraph)                        |
| <b>Methods</b>                   |         |                                                                                                                                                                                             |                                                |
| Trial design                     | 3a      | Description of trial design (such as parallel, factorial) including allocation ratio                                                                                                        | Page 5 (Study Design)                          |
|                                  | 3b      | Description of trial design (such as parallel, factorial) including allocation ratio                                                                                                        | N/A                                            |
| Participants                     | 4a      | Eligibility criteria for participants                                                                                                                                                       | Page 6                                         |
|                                  | 4b      | Settings and locations where the data were collected                                                                                                                                        | Page 7                                         |
| Interventions                    | 5       | The interventions for each group with sufficient details to allow replication, including how and when they were actually administered                                                       | Page 6-7 (3D-ITM Intervention & Control Group) |
| Outcomes                         | 6a      | Completely defined pre-specified primary and secondary outcome measures, including how and when they were assessed                                                                          | Page 7-8 (Data Collection)                     |
|                                  | 6b      | Any changes to trial outcomes after the trial commenced, with reasons                                                                                                                       | N/A                                            |
| Sample size                      | 7a      | How sample size was determined                                                                                                                                                              | Page 6 (n=54, based on cohort size)            |
|                                  | 7b      | When applicable, explanation of any interim analyses and stopping guidelines                                                                                                                | N/A                                            |
| <b>Randomisation</b>             |         |                                                                                                                                                                                             |                                                |
| Sequence generation              | 8a      | Method used to generate the random allocation sequence                                                                                                                                      | Page 6 (Stratified randomization)              |
|                                  | 8b      | Type of randomisation; details of any restriction (such as blocking and block size)                                                                                                         | Page 6-7                                       |
| Allocation concealment mechanism | 9       | Mechanism used to implement the random allocation sequence (such as sequentially numbered containers), describing any steps taken to conceal the sequence until interventions were assigned | Page 6-7 (implied by randomization method)     |
| Implementation                   | 10      | Who generated the random allocation sequence, who enrolled participants, and who assigned participants to interventions                                                                     | Page 6                                         |
| Blinding                         | 11a     | If done, who was blinded after assignment to interventions (for example, participants, care providers,                                                                                      | Page 7-8 (Blinded researchers for proposal     |

|                                                      |     |                                                                                                                                                   |                                                            |
|------------------------------------------------------|-----|---------------------------------------------------------------------------------------------------------------------------------------------------|------------------------------------------------------------|
|                                                      |     | those assessing outcomes) and how                                                                                                                 | scoring)                                                   |
|                                                      | 11b | If done, who was blinded after assignment to interventions (for example, participants, care providers, those assessing outcomes) and how          | N/A                                                        |
| Statistical methods                                  | 12a | Statistical methods used to compare groups for primary and secondary outcomes                                                                     | Page 7-8 (SPSS, Mann-Whitney U tests)                      |
|                                                      | 12b | Methods for additional analyses, such as subgroup analyses and adjusted analyses                                                                  | N/A                                                        |
| <b>Results</b>                                       |     |                                                                                                                                                   |                                                            |
| Participant flow (a diagram is strongly recommended) | 13a | For each group, the numbers of participants who were randomly assigned, received intended treatment, and were analysed for the primary outcome    | Page 6 (54 allocated; all analysed)                        |
|                                                      | 13b | For each group, losses and exclusions after randomisation, with reasons                                                                           | None reported                                              |
| Recruitment                                          | 14a | Dates defining the periods of recruitment and follow-up                                                                                           | Page 6 (2025 academic year)                                |
|                                                      | 14b | Why the trial ended or was stopped                                                                                                                | N/A (completed as planned)                                 |
| Baseline data                                        | 15  | A table showing baseline demographic and clinical characteristics for each group                                                                  | N/A (groups comparable by stratification)                  |
| Numbers analysed                                     | 16  | For each group, number of participants (denominator) included in each analysis and whether the analysis was by original assigned groups           | Page 7 (all 27 per group)                                  |
| Outcomes and estimation                              | 17a | For each primary and secondary outcome, results for each group, and the estimated effect size and its precision (such as 95% confidence interval) | Page 8-11 (Results section; medians and p-values reported) |
|                                                      | 17b | For binary outcomes, presentation of both absolute and relative effect sizes is recommended                                                       | N/A                                                        |
| Ancillary analyses                                   | 18  | Results of any other analyses performed, including subgroup analyses and adjusted analyses, distinguishing pre-specified from exploratory         | Page 11-13                                                 |
| Harms                                                | 19  | All important harms or unintended effects in each group                                                                                           | None reported                                              |
| <b>Discussion</b>                                    |     |                                                                                                                                                   |                                                            |
| Limitations                                          | 20  | Trial limitations, addressing sources of potential bias, imprecision, and, if relevant, multiplicity of analyses                                  | Page 13 (Limitations section)                              |
| Generalisability                                     | 21  | Generalisability (external validity, applicability) of the trial findings                                                                         | Page 14                                                    |
| Interpretation                                       | 22  | Interpretation consistent with results, balancing benefits and harms, and considering other relevant evidence                                     | Page 15-16                                                 |
| <b>Other Information</b>                             |     |                                                                                                                                                   |                                                            |
| Registration                                         | 23  | Registration number and name of trial registry                                                                                                    | Abstract (pending,                                         |

|          |    |                                                                                 |                                                |
|----------|----|---------------------------------------------------------------------------------|------------------------------------------------|
|          |    |                                                                                 | application submitted)                         |
| Protocol | 24 | Where the full trial protocol can be accessed, if available                     | Available from corresponding author on request |
| Funding  | 25 | Sources of funding and other support (such as supply of drugs), role of funders | Page 15 (Funding)                              |
