# Supplementary material
Source: Research Square preprint supplement (doi:10.21203/rs.3.rs-8816883/v1)
Supplement: Supplementary file 2 [file d7378b10a3ba268cb21922aa.pdf]

Dear Dr. Dhamane,

Thank you very much for your thoughtful and constructive comments on our manuscript titled "A Three-Dimensional Integrated Teaching Model for Postgraduate Pathophysiology: Synergizing Value-Based and Competency-Based Education" (Manuscript ID: 2421bbbd-5c75-46af-9d31-ffe5bbff560f) .

Regarding your request for trial registration (ChiCTR), we wish to provide the following update:

We have applied for retrospective registration with the Chinese Clinical Trial Registry (ChiCTR). However, due to the Chinese Lunar New Year holiday (Spring Festival), the registry's administrative approval is currently delayed. The registration application (PID310575) is under review as of February 21, 2026, but the official registration number has not yet been finalized by the registry platform.

We have attached the screenshot of the submission status as proof of our timely application. We will forward the official registration certificate to you immediately upon receipt from ChiCTR. We sincerely apologize for this delay caused by force majeure and greatly appreciate your understanding.

Thank you very much.

The screenshot shows the ChiCTR registration status page. At the top, there is a navigation bar with links: 系统首页Index, 新注册项目New Project, 项目中心Project (highlighted), 个人资料Personal, 密码修改Password, and 意见反馈Feedback. Below the navigation bar, the current position is indicated as 项目中心Project. The main content area features a search and filter interface. The 'Audit status' (审核状态) is set to '待审核/Not be verified'. The search criteria include: Registration No (注册号), Registration topic (注册题目), Registrant (申请注册联系人), Scientific name (正式科学名), Subject code (研究课题代号), and Other Registration (在其它机构注册号). Below the search interface, there is a table with the following data:

| PID    | 注册号/Registration number | 审核状态/State           | 征募状态/Reg Date | 注册时间/Reg Date | 信息来源/Source | 操作/Operate |
|--------|-------------------------|----------------------|---------------|---------------|-------------|------------|
| 310575 |                         | 待审核(Not be verified) | 结束            |               | 注册中心        | 编辑Edit     |

At the bottom of the page, there is a language selector showing '英' (English) and '简' (Simplified Chinese).

Sincerely,

Corresponding Author

Juping Wang

Bengbu Medical University

2025021@bbmu.edu.cn
